# Supplementary material for: Synthesis and photosensitivity of azobenzene functionalized hydroxypropylcellulose
Source: Royal Society of Chemistry journal article supplement (doi:10.1039/c3ra43031f), 2013-01-01
Supplement: c3ra43031f.pdf [file c3ra43031f.pdf]

## Supporting Information

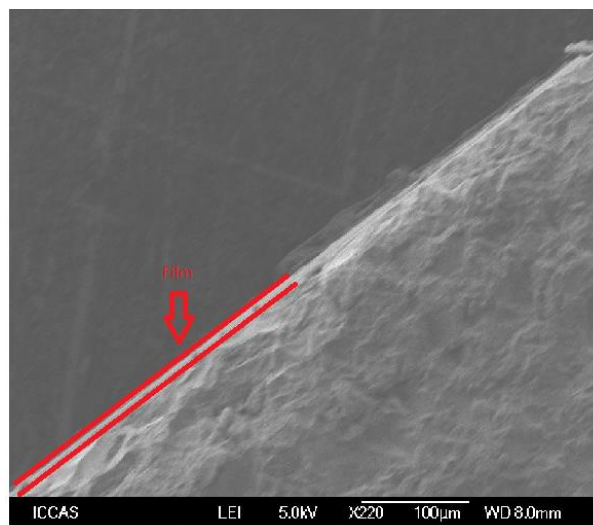

**Fig. S1.** The cross-section of the Azo-HPC film.

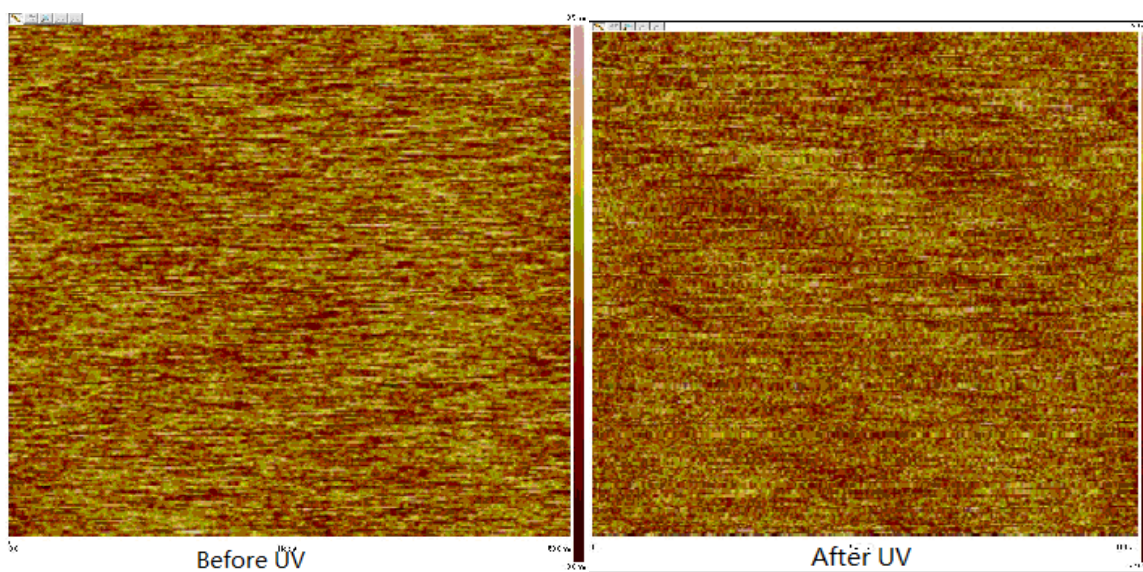

5

**Fig. S2.** AFM height images of the surface of the Azo-HPC films before (left) and after (right) UV irradiation. The dimension of the images is 50 × 50 nm.

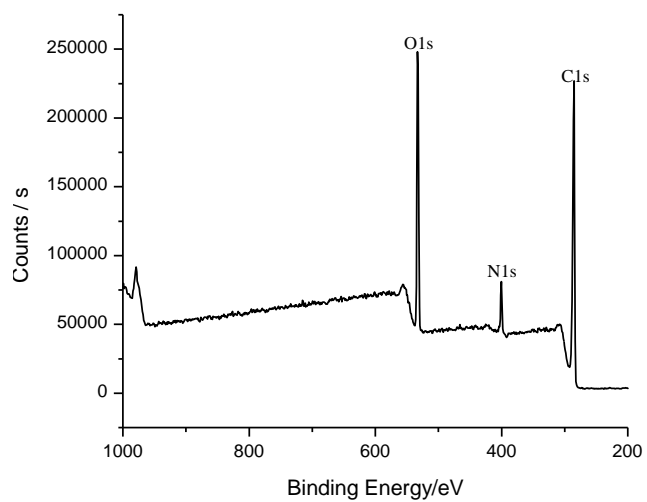

**Fig. S3** XPS spectra of the surface of Azo-HPC3 film.
